# Supplementary material for: Colorimetric and visual detection of cyanide ions based on the morphological transformation of gold nanobipyramids into gold nanoparticles
Source: Royal Society of Chemistry journal article supplement (doi:10.1039/c9nj05929f), 2020-01-01
Supplement: c9nj05929f1.pdf [file c9nj05929f1.pdf]

## SUPPORTING INFORMATION

### **Colorimetric and visual detection of cyanide ions based on the morphological transformation of gold nanobipyramids to gold nanoparticles**

Thangarasu Sasikumar and Malaichamy Ilanchelian\*  
Department of chemistry  
Bharathiar University, Coimbatore - 641046, Tamil Nadu, India

Corresponding author E-mail: [chemsasi16@gmail.com](mailto:chemsasi16@gmail.com), [chelian73@yahoo.com](mailto:chelian73@yahoo.com)

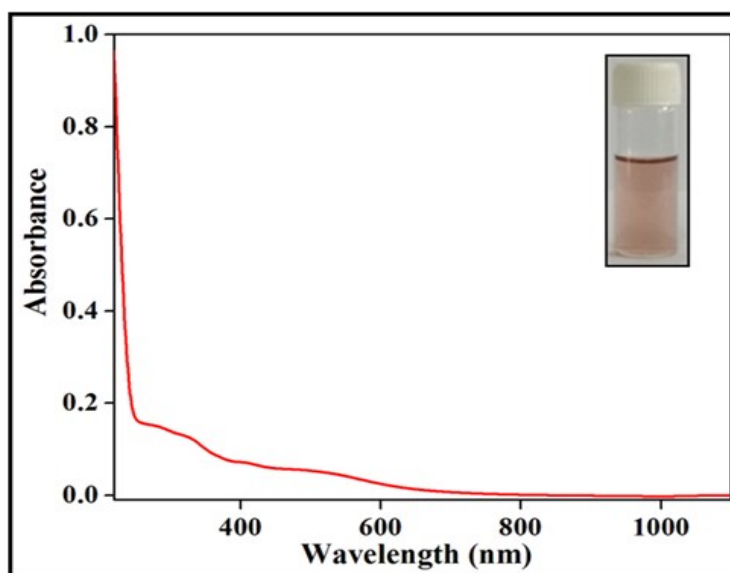

**Fig. S1.** The absorption spectrum of CTAB-stabilized gold nano seeds. Inset: the photographic image of gold seeds.

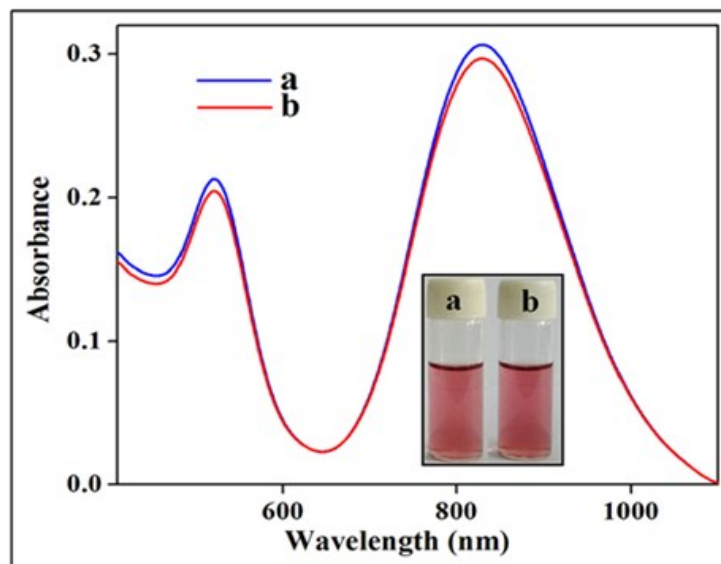

**Fig. S2.** Absorption spectra of Au NBPs (a) and after 3 months aged (b). Inset: the photographs a newly prepared Au NBPs (a) and 3 months aged (b).

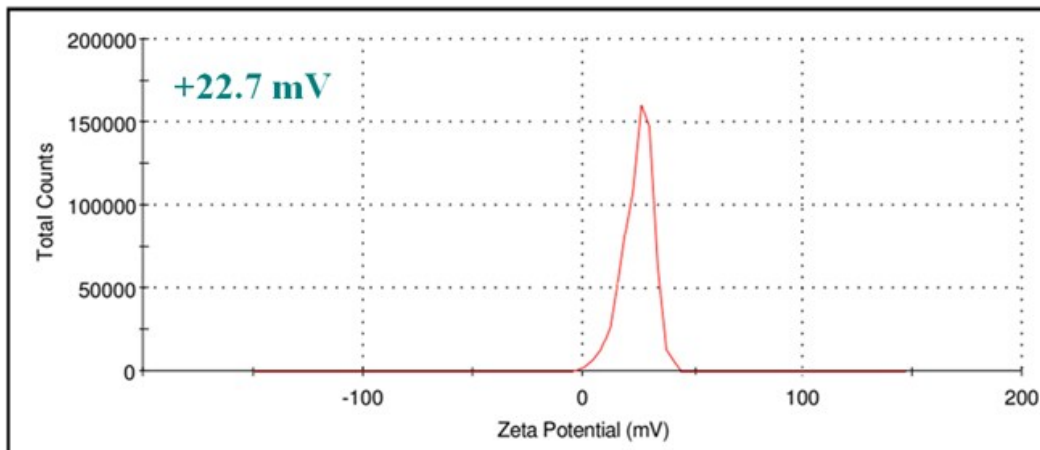

**Fig. S3.** Zeta potential measurement of Au NBPs.

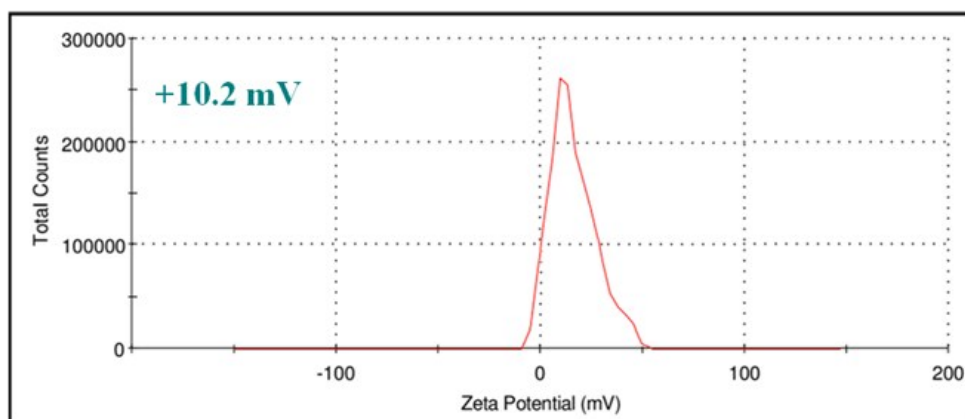

**Fig. S4.** Zeta potential measurement of Au NBPs in the presence of  $\text{CN}^-$  ions.

**Table S1.** Comparison of different spectral methods for the determination of  $\text{CN}^-$  ions.

| <b>S. No.</b> | <b>Detection Method</b> | <b>Probe</b>                                                                                    | <b>Real sample</b>                           | <b>Linear range (<math>\mu\text{M}</math>)</b> | <b>Limit of Detection (nM)</b> | <b>Ref.</b> |
|---------------|-------------------------|-------------------------------------------------------------------------------------------------|----------------------------------------------|------------------------------------------------|--------------------------------|-------------|
| 1.            | Electrochemistry        | Au electrodes                                                                                   | Albumin, blood                               | Up to 400                                      | 3800.00                        | 1           |
| 2.            | Electrochemistry        | Ag working electrode                                                                            | Tap, mineral, table water                    | 0.17-200                                       | 50.00, 120.00                  | 2           |
| 3             | Electrochemistry        | Carbon paste electrode                                                                          | Spring water                                 | 15-10000                                       | 9000.00                        | 3           |
| 4.            | Chromatography          | Isotope Dilution- GC-MS                                                                         | Blood                                        | Up to 2600                                     | 7800.00                        | 4           |
| 5.            | Chromatography          | solid-supported liquid-liquid extraction (SLE) and gas chromatography-mass spectrometry (GC-MS) | Plasma and urine                             | 0.1-20, 0.02-10                                | 40, 10                         | 5           |
| 6.            | Fluorimetry             | BSA-stabilized AuNCs                                                                            | Tap, ground, lake and pond water             | 0.2-9.5                                        | 200.00                         | 6           |
| 7.            | Fluorimetry             | lysozyme-stabilized AuNCs                                                                       | -                                            | 5.0-120.00                                     | 190.00                         | 7           |
| 8.            | Fluorimetry             | L-amino acid oxidase-protected AuNCs                                                            | River, Tap water                             | 3.2-34 and 38.1-104                            | 180 .00                        | 8           |
| 9.            | Fluorimetry             | BSA-Ce/Au NCs                                                                                   | Drinking and pond water                      | 0.1-15                                         | 50.00                          | 9           |
| 10.           | Fluorimetry             | Cu (PcTs) and GSH-AuNCs                                                                         | Rain, Rodbal dam water and human blood serum | 0.1-220.00                                     | 75.00                          | 10          |

|     |                             |                                                                        |                                    |              |          |           |
|-----|-----------------------------|------------------------------------------------------------------------|------------------------------------|--------------|----------|-----------|
| 11. | Fluorimetry                 | CdSe QDs                                                               | -                                  | 1.1-250      | 1100.00  | 11        |
| 12. | Fluorimetry                 | InP quantum wires                                                      | -                                  | 0-0.11       | 2100.00  | 12        |
| 13. | Fluorimetry and Colorimetry | phosphorescent molecular gold(I) cluster in a macroporous polymer film | Red wine, coffee and juice samples | -            | 2000 .00 | 13        |
| 14. | Fluorimetry                 | Blue-emitting copper nanoparticles                                     | River water                        | 0.5 to 18.00 | 370.00   | 14        |
| 15. | Fluorimetry                 | Gold-nanoparticle based fluorescent probes                             | Sea, pond and tap water            | 0-10         | 1000.00  | 15        |
| 16. | Fluorimetry                 | Ag NPs                                                                 | Tap water                          | 0.5-600      | 250      | 16        |
| 17. | Colorimetry                 | Au@Ag core/shell nanoparticles                                         | Industrial, lake and sea water     | -            | 400.00   | 17        |
| 18. | Colorimetry                 | Ag NPs                                                                 | Dam water                          | 16.7-113.3   | 1800.00  | 18        |
| 19. | Colorimetry                 | Au NBPs                                                                | Tap, drinking and sea water        | 1 to 15      | 1.58     | This work |

## Reference

1. A. E. Lindsay and D. O'Hare, *Anal. Chim. Acta*, 2006, **558**, 158-163.
2. C. K. Zacharis, P. D. Tzanavaras, A. N. Voulgaropoulos and B. Karlberg, *Talanta*, 2009, **77**, 1620-1626.
3. A. Abbaspour, M. Asadi, A. Ghaffarinejad and E. Safaei, *Talanta*, 2005, **66**, 931-936.
4. P. Dumas, G. Gingras and A. L. Blanc, *J. Anal. Toxicol.*, 2005, **29**, 71-75.
5. G. Liu, J. Liu, K. Hara, Y. Wang, Y. Yu, L. Gao and L. Li, *J. Chromatogr. B*, 2009, **877**, 3054-3058.
6. Y. Liu, K. Ai, X. Cheng, L. Huo, and L. Lu, *Adv. Funct. Mater.*, 2010, **20**, 951-956.

7. D. Lu, L. Liu, F. Li, S. Shuang, Y. Li, M. M. F. Choi and C. Dong, *Spectrochim. Acta, Part A*, 2014, **121**, 77-80.
8. G. Zhang, Y. Qiao, T. Xu, C. Zhang, Y. Zhang, L. Shi, S. Shuang and C. Dong, *Nanoscale*, 2015, **7**, 12666-12672.
9. C. W. Wang, Y. N. Chen, B.Y. Wu, C. K. Lee, Y. C. Chen, Y. H. Huang, H. T. Chang, *Anal. Bioanal. Chem.*, 2016, **408**, 287-294.
10. Z. Shojaeifard, B. Hemmateenejad and M. Shamsipur, *ACS Appl. Mater. Interfaces*, 2016, **8**, 15177-15186.
11. W. J. Jin, M. T. F. Arguelles, J. M. C. Fernandez, R. Pereiro and A. S. Medel, *Chem. Commun.*, 2005, 883-885.
12. F. A. Al-Agel, W. E. Mahmoud, *Sens. Actuators, B*, 2013, **183**, 441-445.
13. C. Zong, L. R. Zheng, W. He, X. Ren, C. Jiang, and L. Lu, *Anal. Chem.* 2014, **86**, 1687-1692.
14. S. Momeni, R. Ahmadi, A. Safavi, I. Nabipour, *Talanta*, 2017, **175**, 514-521.
15. S. C. Wei, P. H. Hsu, Y. F. Lee, Y. W. Lin, and C. C. Huang, *ACS Appl. Mater. Interfaces*, 2012, **4**, 2652-2658.
16. L. Shang, C. Qin, L. Jin, L. Wang and S. Dong, *Analyst*, 2009, **134**, 1477-1482.
17. J. Zeng, Y. Cao, J. Chen, X. Wang, J. Yu, B. Yu, Z. Yan and X. Chen, *Nanoscale*, 2014, **6**, 9939-9943.
18. S. Hajizadeh, K. Farhadi, M. Forough and R. E. Sabzi, *Anal. Methods*, 2011, **3**, 2599-2603.
